# Supplementary material
Source: publisher site journal article supplement (https://www.dovepress.com/article/532242)

**Supplement Figure 1. Subgroup analysis of associations between hysterectomy and accelerated aging.**


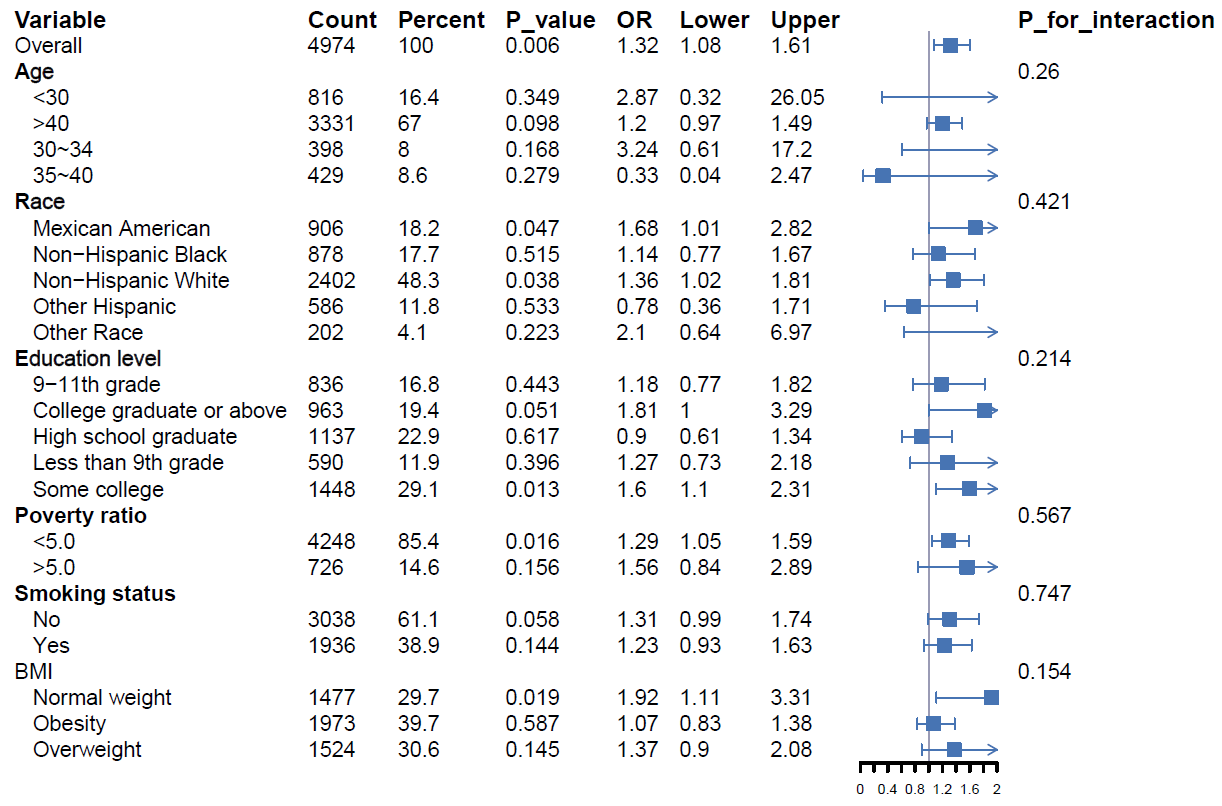

Supplement: Supplementary file 1 [file SFigure_1.docx]
